# Nivalenol and Deoxynivalenol Affect Rat Intestinal Epithelial Cells: A Concentration Related Study

Giuseppe Bianco<sup>1</sup>, Bianca Fontanella<sup>2</sup>, Lorella Severino<sup>3</sup>, Andrea Quaroni<sup>4</sup>, Giuseppina Autore<sup>1</sup>, Stefania Marzocco<sup>1\*</sup>

**1** Department of Pharmaceutical and Biomedical Sciences, School of Pharmacy, University of Salerno, Fisciano, Italy, **2** Telethon Institute of Genetics and Medicine (TIGEM) Naples, Italy, **3** Department of Pathology and Animal Health, Division of Toxicology, School of Veterinary Medicine, University of Naples "Federico II", Naples, Italy, **4** Department of Biomedical Sciences, Cornell University, Ithaca, New York, United States of America

## Abstract

The integrity of the gastrointestinal tract represents a crucial first level defence against ingested toxins. Among them, Nivalenol is a trichothecenes mycotoxin frequently found on cereals and processed grains; when it contaminates human food and animal feed it is often associated with another widespread contaminant, Deoxynivalenol. Following their ingestion, intestinal epithelial cells are exposed to concentrations of these trichothecenes high enough to cause mycotoxicosis. In this study we have investigated the effects of Nivalenol and Deoxynivalenol on intestinal cells in an *in vitro* model system utilizing the non-tumorigenic rat intestinal epithelial cell line IEC-6. Both Nivalenol and Deoxynivalenol (5–80  $\mu$ M) significantly affected IEC-6 viability through a pro-apoptotic process which mainly involved the following steps: (i) Bax induction; (ii) Bcl-2 inhibition, and (iii) caspase-3 activation. Moreover, treatment with Nivalenol produced a significant cell cycle arrest of IEC-6 cells, primarily at the G<sub>0</sub>/G<sub>1</sub> interphase and in the S phase, with a concomitant reduction in the fraction of cells in G<sub>2</sub>. Interestingly, when administered at lower concentrations (0.1–2.5  $\mu$ M), both Nivalenol and Deoxynivalenol affected epithelial cell migration (restitution), representing the initial step in gastrointestinal wound healing in the gut. This reduced motility was associated with significant remodelling of the actin cytoskeleton, and changes in expression of connexin-43 and focal adhesion kinase. The concentration range of Nivalenol or Deoxynivalenol we have tested is comparable with the mean estimated daily intake of consumers eating contaminated food. Thus, our results further highlight the risks associated with intake of even low levels of these toxins.

**Citation:** Bianco G, Fontanella B, Severino L, Quaroni A, Autore G, et al. (2012) Nivalenol and Deoxynivalenol Affect Rat Intestinal Epithelial Cells: A Concentration Related Study. PLoS ONE 7(12): e52051. doi:10.1371/journal.pone.0052051

**Editor:** Aditya Bhushan Pant, Indian Institute of Toxicology Reserach, India

**Received:** September 10, 2012; **Accepted:** November 12, 2012; **Published:** December 14, 2012

**Copyright:** © 2012 Bianco et al. This is an open-access article distributed under the terms of the Creative Commons Attribution License, which permits unrestricted use, distribution, and reproduction in any medium, provided the original author and source are credited.

**Funding:** This work was supported by grant from the University of Salerno (FARB 2011). No current external funding sources for this study. The funders had no role in study design, data collection and analysis, decision to publish, or preparation of the manuscript.

**Competing Interests:** The authors have declared that no competing interests exist.

\* E-mail: address: smarzocco@unisa.it

## Introduction

Mycotoxins are food contaminants produced by secondary metabolism of fungi found primarily in cereal grains and derived products. They are not essential to mold growth but sporadically contaminate crops, causing major economic losses every year. Moreover the consumption of food or feed contaminated by mycotoxins is a potential health hazard for both human and animal health [1,2]. More than 400 different mycotoxins have been isolated and chemically characterized; those of major medical and agricultural concern are aflatoxins, ochratoxins, trichothecenes, zearalenone and fumonisins. Data from the FAO showed that about 25% of food world production is contaminated by at least one mycotoxin [3].

Trichothecenes mycotoxins are chemically related compounds produced by different fungal genera, including *Fusarium*, *Penicillium*, *Mycrothecium*, *Trichoderma*, *Trichothecium*, *Stachybotrys*, *Verticillium*, and *Cephalosporium* [4]. A data collection on the occurrence of *Fusarium* toxins in food in the European Union showed a 57% incidence of positive samples for deoxynivalenol (DON) and 16% for nivalenol (NIV), out of several thousands of samples analysed [5]. Due to their toxic properties and their high

stability to heat treatment, the presence of these mycotoxins in the food chain is potentially hazardous to health [6–9].

The clinical toxicological syndromes caused by ingestion of moderate to high amounts of mycotoxins have been well characterized: they range from acute mortality to slowed growth, and may include reduced reproductive efficiency, gastrointestinal disorders, altered nutritional efficiency [10,11].

The intestinal epithelial layer represents the first barrier preventing the entry of foreign antigens, including natural toxins, into the underlying tissues. Intestinal epithelial cells (IECs) form a monolayer that constitutes a dynamic and selective barrier which mediates the transport of a variety of molecules. The intestinal epithelium is normally subjected to deformation due to diverse physical forces, including peristalsis during normal gut function. As a consequence of their exposed location, IECs have developed a variety of mechanisms, aside from physical, which act to reduce the toxicity of chemicals and the possible invasion by foreign agents (e.g. protective mucus, antimicrobial peptide secretion, epithelial wound healing and cytokine synthesis) [12]. Long-term NIV chronic exposure in mice induced a reduced body gain and feed efficiency, and an increase in relative organ weight or severe leucopenia [13]. NIV, associated with other trichothecenes, has

been shown to correlate with the high incidence of oesophageal cancer in China [14,15]; those authors also observed papillomas and carcinomas in 47% of mice topically exposed to NIV during 60 weeks. At the cellular level, several reports indicated that DON could alter barrier function [16–18], IECs differentiation and the uptake of nutrients [19]. It has also been shown that, as other trichothecenes, NIV and DON are particularly potent inhibitors of protein synthesis and they are able to interfere primarily with the high proliferation rate of cells in tissues such as spleen, bone marrow, thymus and intestinal mucosa. To our knowledge, the effects of NIV on non tumorigenic cells of intestinal origin has been never studied and only few data exist on the effect of NIV and DON, at low doses, on intestinal homeostasis [16,20,21]. Thus, the aim of this study was to test the effects of variable concentrations of NIV and/or DON on the non tumorigenic intestinal epithelial cells, IEC-6.

## Materials and Methods

### Reagents

Unless stated otherwise, all reagents and compounds were obtained from Sigma Chemicals Company (Sigma, Milan, Italy).

### Preparation of Trichothecenes Mycotoxins

NIV and DON 10 mM stock solutions of were prepared by dissolution in ethanol and methanol. Then we diluted such solutions with medium obtaining working solutions subsequently divided in several aliquots and stored at  $-20^{\circ}\text{C}$ . Before every experiment a fresh aliquot of NIV and DON was used. NIV and DON vehicle was present in cellular medium at concentration lower than 0.5%. The same concentrations of vehicle was added to controls in all experiments.

### Cell Culture

The IEC-6 cell line (CRL-1592) was purchased from the American Type Culture Collection (ATCC, Rockville, MD, USA). IEC-6 cell originated from normal rat intestinal crypt cells [22]. This non-tumorigenic cell line was cultured using Dulbecco's modified Eagle's medium (4 g/L glucose) supplemented with 10% (v/v) heat-inactivated fetal bovine serum, 2 mM L-glutamine, 1.5 g/L  $\text{NaHCO}_3$ , and 0.1 unit/ml bovine insulin. Cells were used at the 17<sup>th</sup>–21<sup>st</sup> passage.

### Cell Viability Assay

Cells ( $5 \times 10^3$ ) were plated in 96-well microtiter plates and allowed to adhere. Thereafter cells were synchronised for 24 h in serum free media before being exposed to NIV or DON (0.5–80  $\mu\text{M}$ ), alone or in combination, for further 24 h in DMEM serum free. Cell viability was then assessed as previously reported using the MTT assay [23,24]. Briefly, 25  $\mu\text{L}$  of MTT (5 mg/mL) were added and the cells were incubated for 3 h. Thereafter, cells were lysed and the dark blue crystals solubilised with 100  $\mu\text{L}$  of a solution containing 50% (v/v) N,N-dimethylformamide, 20% (v/v) SDS with an adjusted pH of 4.5. The optical density (OD) of each well was measured with a microplate spectrophotometer (Titertek Multiskan MCC/340) equipped with a 620 nm filter. IEC-6 viability in response to treatment with NIV and DON was calculated as: % dead cells =  $100 - (\text{OD treated} / \text{OD control}) \times 100$ .

### Analysis of Apoptosis and Cell Cycle Distribution

Hypodiploid DNA was analyzed using PI staining by flow cytometry [25]. Briefly, IEC-6 ( $3.5 \times 10^5$ ) cells were grown in 24-well plates and allowed to adhere. Thereafter cells were synchronised for 24 h in serum free media before being exposed

to NIV or DON (0.5–80  $\mu\text{M}$ ) for further 24 h, in DMEM serum free. Following treatment, culture medium was removed, cells washed once with PBS and then resuspended in 500  $\mu\text{L}$  of a solution containing 0.1% (w/v) sodium citrate, 0.1% Triton X-100 and 50  $\mu\text{g}/\text{mL}$  propidium iodide (PI).

Culture medium and PBS were centrifuged and cell pellets were pooled with cell suspension to retain both dead and living cells for analysis. After incubation at  $4^{\circ}\text{C}$  for 30 min in the dark, cell nuclei were analyzed with a Becton Dickinson FACScan flow cytometer using the CellQuest program and the DNA content of the nuclei was registered on a logarithmic scale. Cellular debris was excluded from the analysis by raising the forward scatter threshold, then the percentage of cells in the hypodiploid region (sub  $G_0/G_1$ ) was calculated.

To elucidate apoptosis caspases involvement, in some experiments a broad-spectrum caspase inhibitor, zVAD-fmk (50  $\mu\text{M}$ ) was added to IEC-6 cells 30 min before NIV or DON (40 and 20  $\mu\text{M}$ , concentration which gives a medium level of apoptosis). Data are expressed as the percentage of cells in the hypodiploid region.

The effect of NIV or DON on the cell cycle was tested at the concentration of 10  $\mu\text{M}$  [26]. This concentration was chosen because it does not induce a too high level of apoptosis that could result in different number of cells analysed during experiments. IEC-6 cells were seeded in a 12-wells plastic plate at  $7.0 \times 10^5$  cells/well and allowed to adhere. Thereafter cells were synchronised for 24 h in serum free media before being exposed to NIV or DON at the concentration of 10  $\mu\text{M}$  for 24 h, in DMEM serum free. After incubation, IEC-6 cells were harvested and fixed in cold 70% ethanol at  $-20^{\circ}\text{C}$ . Cell cycle profiles were evaluated by DNA staining with PI (2.5 mg/ml) in phosphate-buffered saline (PBS) supplemented with 100 U/mL ribonuclease A, for 30 min at room temperature. Samples were analysed with a FACScan flow cytometer (Becton Dickinson, CA) using Mod FitLT program.

### Confocal Microscopy: Nuclei Analysis

Cells ( $3.5 \times 10^5$ /well) were plated on 12 mm glass coverslips in 24 well plates and allowed to adhere, thereafter cells were synchronised for 24 h in serum free media before being exposed to NIV or DON (0.5–20  $\mu\text{M}$ ) for 24 h, in DMEM serum free. Cells were then fixed in p-formaldehyde (4% v/v in PBS) for 30 min. Cells were permeabilized in Triton X-100 (0.1% v/v in PBS) for 10 min, and then incubated with DAPI at a concentration of 1  $\mu\text{g}/\text{mL}$  in PBS for 30 min. The coverslips were mounted with Vectashield (Vector Laboratories, Burlingame, CA, USA). A Zeiss LSM 710 Laser Scanning Microscope (Carl Zeiss MicroImaging GmbH, Jena, Germany) was used for data acquisition. To detect nucleus and filaments, samples were excited with a 458 nm Ar laser. Samples were vertically scanned from the bottom of the coverslip with a total depth of 5 mm and a  $63 \times (1.40 \text{ NA})$  Plan-Apochromat oil immersion objective. A total of 10 z-line scans with a step distance of 0.5  $\mu\text{m}$  were collected and single planes or maximum intensity projections were generated with Zeiss ZEN Confocal Software (Carl Zeiss MicroImaging GmbH).

### Confocal Microscopy: Cytoskeleton Analysis

To study the effects of mycotoxins at non-apoptotic concentrations on cellular cytoskeleton, NIV and DON were tested at concentrations between 2.5 and 0.5  $\mu\text{M}$ . Cells ( $3.5 \times 10^5$ /well) were plated on 12 mm glass coverslips in 24 well plates and allowed to adhere; therefore cells were synchronised for 24 h in serum free media before being exposed to NIV or DON for 24 h, in serum free DMEM. Cells were then fixed in p-formaldehyde (4% v/v in PBS) for 30 min. Cells were permeabilized in Triton X-100 (0.1% v/v in PBS) for 10 min, and then incubated with

FITC-conjugated anti-F-actin (Phalloidin-FITC, Sigma) at the concentration of 1 µg/mL in PBS for 30 min. The coverslips were mounted with Vectashield (Vector Laboratories, Burlingame, CA, USA). A Zeiss LSM 710 Laser Scanning Microscope (Carl Zeiss MicroImaging GmbH, Jena, Germany) was used for data acquisition. To detect nuclei and filaments, samples were excited with a 488 nm Ar laser. Samples were vertically scanned from the bottom of the coverslip with a total depth of 5 µm and a 63× (1.40 NA) Plan-Apochromat oil immersion objective. A total of 10 z-line scans with a step distance of 0.5 µm were collected and single planes or maximum intensity projections were generated with Zeiss ZEN Confocal Software (Carl Zeiss MicroImaging GmbH).

### Western Blot Analysis

IEC-6 cells ( $6 \times 10^5$ /P60) were plated and allowed to adhere at 37°C in a 5% CO<sub>2</sub> atmosphere for 24 h. The medium was replaced with serum-deprived medium and after 24 h NIV or DON (0.5–20 µM) were added and cells incubated for additional 24 h.

Cells were lysed in lysis buffer (50 mM Tris-HCl pH 7.4, with 1% Triton X-100, 150 mM NaCl, 5 mM EDTA, 1 mM phenylmethylsulfonyl fluoride, 2 mM N-ethylmaleimide, 50 mM NaF, 2 mM Na<sub>3</sub>VO<sub>4</sub>, 5 µg/mL aprotinin and 5 µg/mL leupeptin). Protein content was estimated according to Biorad protein assay (BIO-RAD, Milan, Italy) and 50 µg protein/lane were loaded onto an acrylamide gel and separated by SDS-PAGE under denaturing conditions. The separated proteins were then transferred electrophoretically (200 mA per blot 45 min; Trans Blot Semi-Dry, BIO-RAD) to nitrocellulose paper (Immobilon-NC, Millipore, Bedford, USA) soaked in transfer buffer (25 mM Tris, 192 mM glycine, Sigma-Aldrich) and 20% methanol vol/vol (Carlo Erba, Milan, Italy). Non specific binding was blocked by incubation of the blots in 5% no fat dry-milk powder (BIO-RAD) in TBS/0.1% Tween (25 mM Tris; 150 mM NaCl; 0.1% Tween vol/vol, Sigma-Aldrich) for 60 min. After washing, the blots were incubated overnight at 4°C with the primary antibody anti-Bax, anti-Bcl-2, anti-procaspase, anti-caspase-3 for apoptosis studies and anti-connexin-43 (Cx43), anti-phospho-connexin-43, anti-Focal Adhesion Kinase (FAK) and anti-phospho-Focal Adhesion Kinase for cell migration studies; α-tubulin was used as reference protein (all from Santa-Cruz Biotechnology, D.B.A. ITALIA s.r.l, Milan, Italy). After incubation with the primary antibodies and washing in TBS/0.1% Tween, the appropriate secondary antibody, either anti-mouse (diluted 1:1000) or anti-rabbit (diluted 1:5000), was added for 1 h at room temperature. Immunoreactive protein bands were detected by chemiluminescence using enhanced chemiluminescence reagents (ECL) and exposed to Hyperfilm (both from Amersham Biosciences, Milan, Italy). Films were then subjected to densitometric analysis using a Gel-Doc 2000 system (BIO-RAD).

### Wound-healing Assay

IEC-6 cells were seeded in a 12-well plastic plate at  $1.8 \times 10^5$  cells per well and allowed to adhere; after 24 h of serum deprivation a wound was produced at the centre of the monolayer by gently scraping cells with a sterile plastic p200 pipette tip. Then the incubation medium was removed and cells washed with PBS and incubated with NIV and DON, alone or in combination, at non apoptotic concentrations (0.5–2.5 µM).

The wounded cell cultures were then incubated at 37°C in a humidified and equilibrated (5% v/v CO<sub>2</sub>) incubation chamber of an Integrated Live Cell Workstation Leica AF-6000 LX. A 10× phase contrast objective was used to record cell movements with

a frequency of acquisition of 10 min. The migration rate of individual cells was determined by measuring the distances covered from the initial time to the selected time-points (bar of distance tool, Leica ASF software). For each condition three independent experiments were performed. For each wound three different positions were registered, and for each position ten different cells were randomly selected to measure the migration distances. Statistical analyses were performed using GraphPad Prism 4 software (GraphPad, San Diego, CA).

### Data Analysis

All the values shown in tables, figures and text are expressed as mean ± standard error of the mean of at least three independent experiments in triplicate. Data sets were examined by one-way analysis of variance and individual group means were then compared with Bonferroni or Student's unpaired t-test. A P-value less than 0.05 was considered as significant.

## Results

### NIV and DON Affect IEC-6 Viability

After incubation of IEC-6 cells with graded concentrations of NIV or DON alone or in combination (0.5–80 µM) for 24 h, cell viability was determined using the MTT assay. Control cells viability was designated as 100% and results have been expressed as the concentration of each mycotoxin which induces 50% of mortality in IEC-6 (IC<sub>50</sub>). Both mycotoxins exerted a significant effect on cell viability and had anti-proliferative activity on IEC-6 (IC<sub>50</sub> value for NIV:  $17.75 \pm 0.47$  µM; IC<sub>50</sub> value for DON  $50.82 \pm 0.85$  µM,  $P < 0.001$  vs control). In particular NIV exerted a stronger anti-proliferative activity compared to DON ( $P < 0.001$ ). Moreover, the presence of NIV and DON together in the incubation medium did not induce either additive or synergistic effects on IEC-6 viability (IC<sub>50</sub> value for NIV+DON:  $18.90 \pm 0.59$  µM).

### NIV- and DON-induced Apoptosis in IEC-6 Cells

In order to investigate the mechanism(s) underlying cell observed decrease in cell viability observed in NIV- or DON-treated IEC-6 cells a cytofluorimetric analysis was performed by incubating IEC-6 with graded concentrations of each mycotoxin (0.5–80 µM) for 24h. Apoptosis was evaluated by cytofluorimetric analysis of PI stained hypodiploid nuclei (Fig. 1). Our results indicate that both NIV and DON significantly ( $P < 0,001$ ) induced apoptosis in IEC-6, in a concentration-dependent manner, from 5 µM and 10 µM for NIV- or DON-treated cells respectively; whereas any apoptotic effect have been observed at the lowest concentrations tested (2.5 µM for NIV and 5 µM for DON). Interestingly the NIV pro-apoptotic effect at concentrations of 10–80 µM was significantly higher than DON's, indicating a stronger pro-apoptotic activity for NIV. Similarly to the effect observed on cell viability, no additive or synergistic effects on IEC-6 apoptosis were observed after incubation with NIV and DON together (data not shown).

### Induction of Nuclear Morphological Changes in IEC-6 by NIV and DON

In order to confirm induction of apoptosis and perturbation in cell morphology due to the trichothecenes NIV or DON, IEC-6 nuclei were also observed after DAPI staining (Fig. 2). At the lowest concentrations tested (0.5 and 2.5 µM) cell nuclei appeared similar to untreated cells. Apoptotic cells were clearly identified by the appearance of pyknotic nuclei and apoptotic bodies (condensed and fragmented nuclei) after incubation with the highest

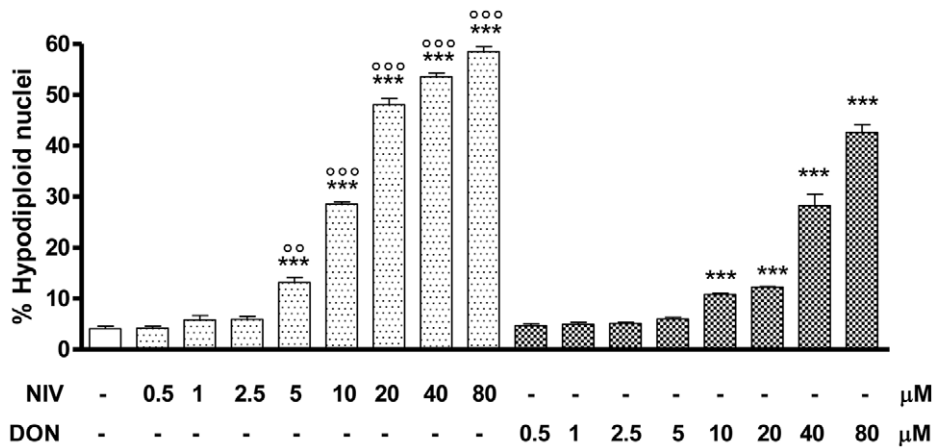

**Figure 1. Apoptosis detection by propidium iodide (PI) staining of hypodiploid nuclei after IEC-6 incubation with NIV or DON (0.5–80 μM) for 24 h.** Both NIV and DON exhibited a significant and concentration-related pro-apoptotic effect on IEC-6 at concentrations higher than 5 μM and 10 μM respectively (\*\* $P < 0.001$  vs control). NIV at the concentrations between 5 and 80 μM exhibits a stronger pro-apoptotic effect compared to the same concentrations of DON (°°° $P < 0.001$ , °° $P < 0.01$  vs DON). Data are expressed mean  $\pm$  s.e.m. from at least three-independent experiments.

doi:10.1371/journal.pone.0052051.g001

NIV concentrations tested (10–20 μM). The same DON concentrations (10–20 μM) induced a lesser effect. For these experiments, to better represent the results obtained, NIV and DON were tested at concentrations not so far from NIV IC<sub>50</sub>.

#### Induction of Cell Cycle Arrest by NIV and DON

In order to determine if NIV and DON could also affect cell cycle distribution we carried out a cell cycle analysis using a mycotoxin concentration which does not induce a strong apoptotic effect. We treated IEC-6 with 10 μM of each mycotoxin for 24 h. As showed in Fig. 3, exposure for 24 h to NIV (10 μM) resulted in a significant increase of the G<sub>0</sub>/G<sub>1</sub> and S phase cell cycle distribution ( $P < 0.01$  vs control) accompanied by a significant ( $P < 0.001$  vs control) decrease in G<sub>2</sub> phase compared to untreated cells. No significant changes in cell cycle profile was observed in DON-treated cells.

#### NIV and DON Affects Bax and Bcl-2 Expression IEC-6

The pro-apoptotic protein Bax and the anti-apoptotic protein Bcl-2 are involved in apoptotic process. In order to examine the effect of NIV or DON on these proteins their expression was assayed in IEC-6 exposed to trichothecenes by Western blot analysis. Both trichothecenes induced an altered expression of Bax (Fig. 4, panel A) and Bcl-2 (Fig. 4, panel B) compared with the control cells. Bax expression was significantly increased in NIV and DON treated cells at the concentrations of 20 and 10 μM ( $P < 0.05$ ). Bcl-2 expression was significantly decreased in NIV treated cells at all tested concentrations ( $P < 0.001$ ) whereas DON treatment induced a significant increase only at the highest tested concentration (20 μM;  $P < 0.01$ ). Both in Bax increase and in Bcl-2 decrease NIV resulted stronger compared to DON ( $p < 0.05$ ).

#### Caspase Activation in NIV and DON Treated IEC-6

Caspase-3 activation by proteolytic cleavage is a marker and an irreversible step in the apoptosis cascade [26]. Treatment with DON, and even more with NIV-treated IEC-6 led to a marked increase in caspase-3 expression, associated with a decrease in pro-caspase-3, the inactive form of caspase-3 (Fig. 5, panel A). In order to determine whether caspase activation could contribute to apoptosis induced in IEC-6 by NIV and DON, we exposed cells to

trichothecenes in presence of zVAD-fmk, a broad-spectrum inhibitor of caspases. As shown in Fig. 5, panel B, zVAD-fmk (50 μM), significantly ( $P < 0.001$ ) reduced the percentage of hypodiploid nuclei, indicating a role of caspase activation in NIV and DON induced apoptosis.

#### NIV and DON Reduce IEC-6 Migration

To determine if NIV or DON at non-apoptotic concentrations influence intestinal epithelial cells homeostasis, we performed a wound-healing assay on IEC-6 monolayers in the presence of graded concentrations (0.5–2.5 μM) of each mycotoxin alone or in combination. The confluent cultures were scraped to create a wound and cell migration was monitored by time-lapse video-microscopy at the site of the wound for 24 h. We measured the migration distances of selected cells at different time points. Figure 6 shows a progressive concentration-related slowing down in migration speed of cells treated with NIV or DON compared to untreated cells. Also in these experiments NIV was more powerful than DON (Fig. 6, panel B) in reducing IEC-6 restitution leading to a stronger reduction of cell migration at the lowest tested concentration. No additive or synergic effects on wound repair was observed in restitution after IEC-6 treatment with NIV and DON together.

#### Trichothecenes Induce IEC-6 Actin Cytoskeleton Rearrangement

As actin stress fibers play a crucial role in the remodelling, stretching and migration of epithelial cells, we examined the effect of NIV or DON on the assembly of actin stress fibers in the cells at the wound front, in order to investigate the mechanisms of trichothecenes inhibition on IEC-6 epithelial wound repair. After epithelial wound generation, the F-actin microfilaments were labeled with fluorescein-conjugated phalloidin, as described in the Method section. Untreated cells showed an intact actin cytoskeleton with a thick actin cortex and thin visible stress fibers traversing the cytosol; actin stress fibers appeared diffusely present in the cytoplasm of the migrating cells at the wound front, also characterized by stretching and elongation (Fig. 7). In contrast, the addition of DON and, more markedly of NIV, caused a reorganisation of actin filaments characterised by their redistribution to

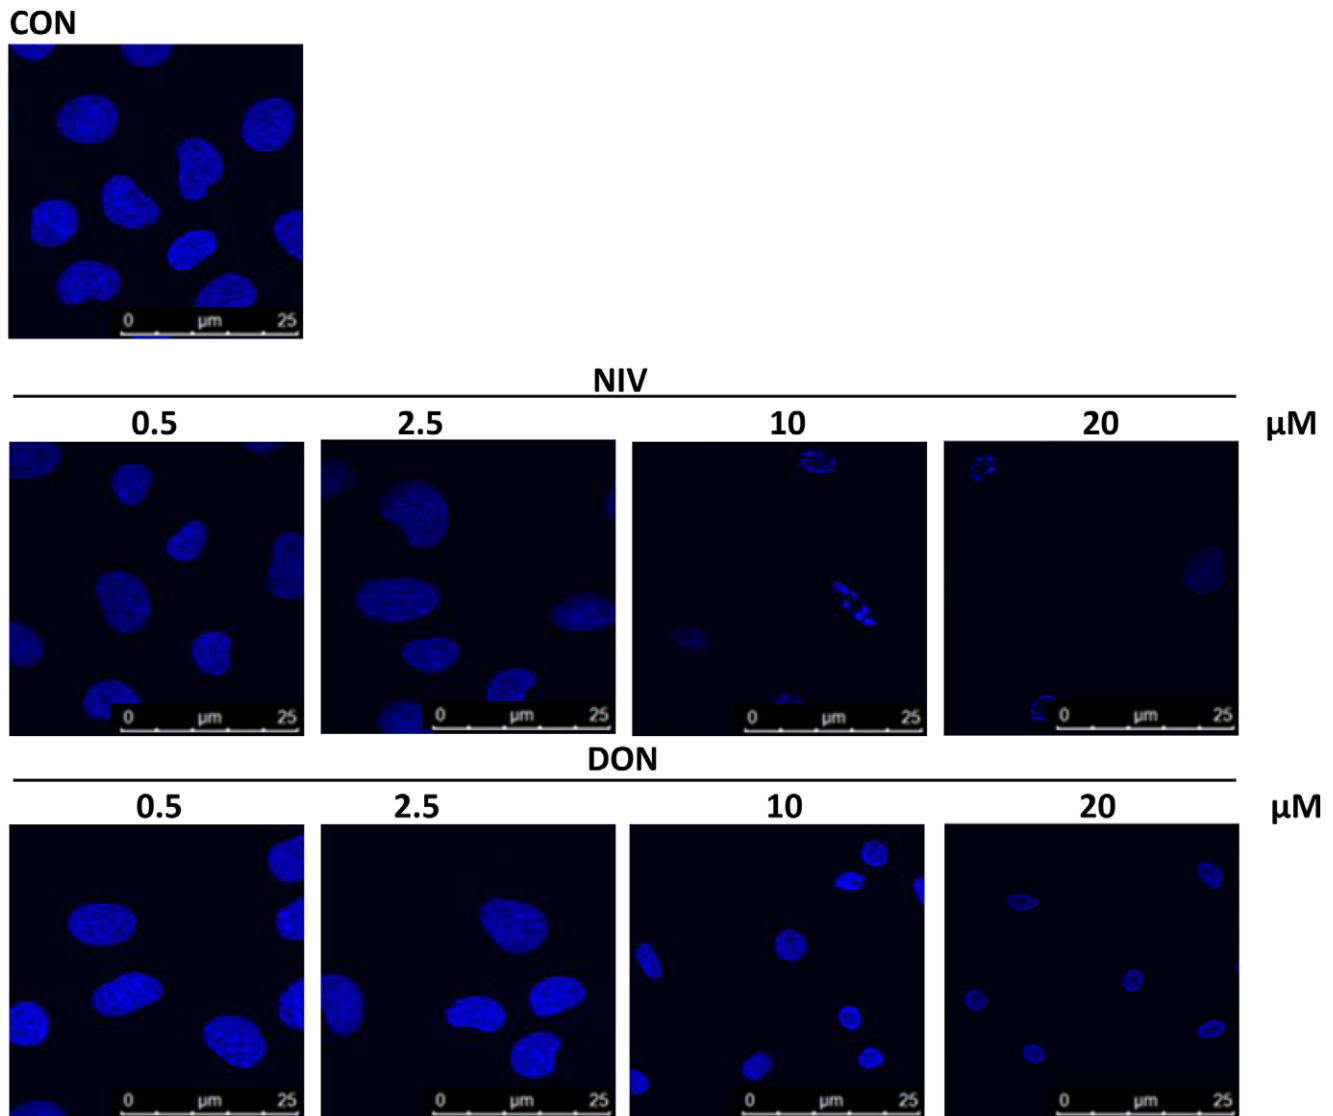

**Figure 2. Apoptotic nuclear morphological changes highlighted by DAPI staining in cells treated with graded concentration of NIV and DON (0.5–20  $\mu\text{M}$ ) for 24 h.** Apoptotic cells showed pyknotic nuclei and apoptotic bodies were clearly identified after incubation with higher concentration of NIV while DON induces a less marked effect. Cultures were examined and photographed using a confocal microscope as described in method section.

doi:10.1371/journal.pone.0052051.g002

the cell subcortical compartment and subsequent cell rounding in a concentration dependent manner (Fig. 7).

#### NIV and DON Induce Changes in Gap Junction, Connexin-43 and Focal Adhesion Kinase Expression

Because enterocytes migrate together, mucosal healing may require inter-enterocyte communication via gap junctions. Western blotting analysis showed the Cx43 (Fig.8) and FAK (Fig. 9) contribute in the reduced migration observed in NIV or DON treated IEC-6 cells. Cx43 and pCx43 were significantly reduced in IEC-6 cells treated with NIV at all assayed concentrations (10–0.5  $\mu\text{M}$   $P < 0.05$ ) while DON treatment reduces Cx43 and pCx43 at concentrations between 10 and 1  $\mu\text{M}$  ( $P < 0.001$ ; Fig.8). Similar effects were observed on FAK and pFAK expression: both NIV and DON significantly reduced FAK and pFAK expression but, as for Cx43, this effect was stronger for NIV compared with DON (Fig. 9).

#### Discussion

The importance of studying the trichothecenes NIV and DON is related to food and feed contamination, which induces severe consequences on both human and animal health.

The gut mucosa is the first and the principal site of mycotoxins exposure and toxic action and constitutes the first barrier after their ingestion. Human microflora seems to be unable to produce de-epoxidated metabolites of NIV and a close relationship between the dietary exposure and DON recovery in human and animal urine samples has been reported [28,29]. Studies performed on human enterocytes confirmed that trichothecenes, such as DON, easily cross the intestinal monolayer through passive or facilitated diffusion, with a possible contribution of paracellular passage [17,30]. Therefore, IECs could contribute to NIV and DON toxicity by allowing their entry into the systemic circulation and thus their transport to the whole body.

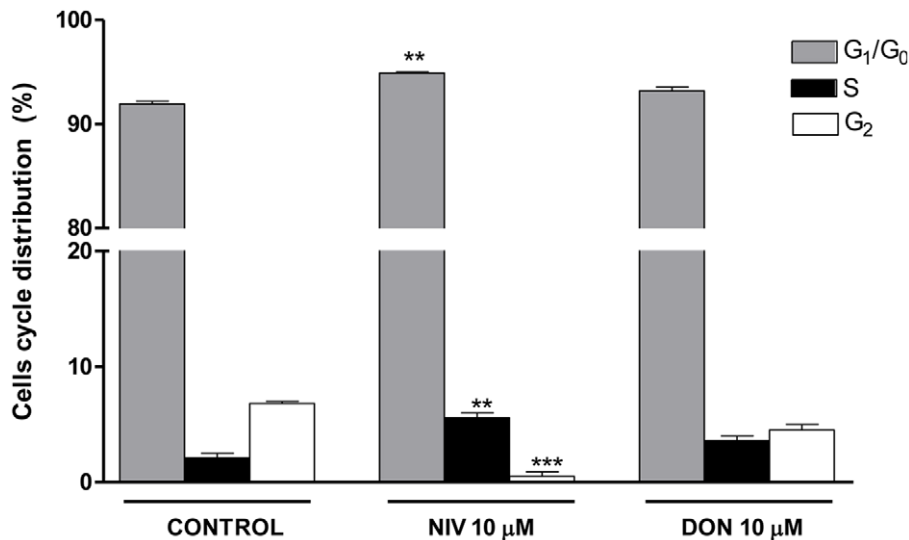

**Figure 3. Flow cytometric analysis of IEC-6 cycle phase distribution.** Cells were treated with either NIV or DON (10 µM) for 24 h, incubated with PI and analysed for cell cycle analysis using a Becton Dickinson FACScan flow cytometer and ModFit software (\*\* $P < 0.01$ , \*\*\* $P < 0.001$  vs control). Data are expressed mean  $\pm$  s.e.m. from at least three-independent experiments. doi:10.1371/journal.pone.0052051.g003

While little was previously known about the effects of NIV in cultured intestinal epithelial cells, in this study we demonstrated that NIV and DON affect IEC-6 cells homeostasis at concentrations plausibly encountered in the gastrointestinal tract after consumption of contaminated food, with significant effects even at concentrations 10 fold lower, acting through different mechanisms. Our data indicate that DON, and more so NIV, exert a significant effect on IEC-6 cell viability. Food and feed commodities are often contaminated by more than one mycotoxin [31]; among the several combinations that frequently occur, NIV and DON are often mentioned [32]. In our study we report that the contemporary presence of NIV and DON in the culture medium added to IEC-6 cells didn't lead to a synergic effect on cell viability thus indicating that their co-presence didn't enhance each own individual effect, in accordance with previous studies on different cell systems [33,34]. In order to investigate if the reduced IEC-6 viability due to treatment with NIV and DON could be related to apoptosis induction we examined hypodiploid nuclei by cytofluorimetric analysis after PI staining. The results of our study indicate that NIV and DON induce apoptosis in IEC-6 by mechanisms involving: (i) cellular morphological changes, (ii) hypodiploid nuclei forming, (iii) the induction of the pro-apoptotic protein Bax; (iv) the inhibition of the anti-apoptotic protein Bcl-2 and (v) the induction of caspase-3 activation. Cell cycle analysis gave another insight into the mechanism of the effects of these mycotoxins on the IEC-6 proliferation. In particular we have also observed that NIV treatment induces in IEC-6 a significant arrest of cell cycle in G<sub>0</sub>/G<sub>1</sub> and G<sub>2</sub>; there was also an increase in S phase. On the contrary no differences in cell cycle phase distribution were observed after 24 h DON treatment, as reported in IPEC-J2 [35].

Our data on NIV and DON ability to induce apoptosis are also in accordance with previous studies, which demonstrated the pro-apoptotic effect of these trichothecenes both in intestinal and non-intestinal cell lines [33,34]. Interestingly our results indicated that NIV-induced apoptosis was greater than for DON at the same concentration range, as we previously reported in cultured macrophages [34]. Moreover, as for cell viability, no additive or synergistic effects on IEC-6 apoptosis were observed after in-

cubation with NIV and DON together, also in accordance with our previous study on macrophages [34]. Members of the Bcl-2 family, as Bcl-2 and Bax, and are involved in signaling pathways regulating caspase-3 activity necessary for chromatin condensation and DNA fragmentation that characterize apoptosis. Our results showed that DON but greater NIV reduced the anti apoptotic protein Bcl-2 expression and increase the pro-apoptotic protein Bax, respect to control cells. The pro-apoptotic complex, involving Bax, induces pores in the mitochondrial membrane leading to cytochrome C release and caspase-9 activation which activates caspase-3. Caspase-3 is an "executioner" that degrades a variety of cellular components producing apoptosis [34]. In order to evaluate caspase-3 involvement in NIV- and DON-induced apoptosis, we exposed IEC-6 to trichothecenes in presence of zVAD-fmk, a broad-spectrum inhibitor of caspases. Incubation of IEC-6 with zVAD-fmk reverted NIV and DON induced apoptosis indicating an involvement of caspase in this process. Moreover Western blot analysis showed an activation of caspase-3 in macrophages exposed to NIV and DON. The intestinal epithelium when injured by various stimuli (e.g. normal digestion, toxic substances, inflammation, oxidative stress) and undergoes a wound healing process. Intestinal wound healing is dependent on a precise balance between migration, proliferation and differentiation of the IECs adjacent to the wound area [36].

Most IEC-6 migrate during the phase of restitution in the wounded area within 24 hours [37]. Here we report that NIV and DON at not pro-apoptotic concentrations ( $< 5 \mu\text{M}$ ), significantly reduced the restitution process; no additive or synergic effects were observed in the contemporary presence of both mycotoxins on IEC-6 restitution. IECs are physically and functionally interconnected via membrane channels that are composed of the gap junction protein Cx43 regulating their migration [37]. Gap junctions exist between adjacent cells and they allow the transfer of small molecules (under 1000 daltons) between adjoining cells. Each gap junction channel is comprised of a pair of hexameric arrays of individual subunits called connexins, of which the most widely expressed isoform is connexin-43 (Cx43) [38,39]. The function of gap junctions is regulated in part through phosphorylation of individual connexin molecules, which serves to regulate

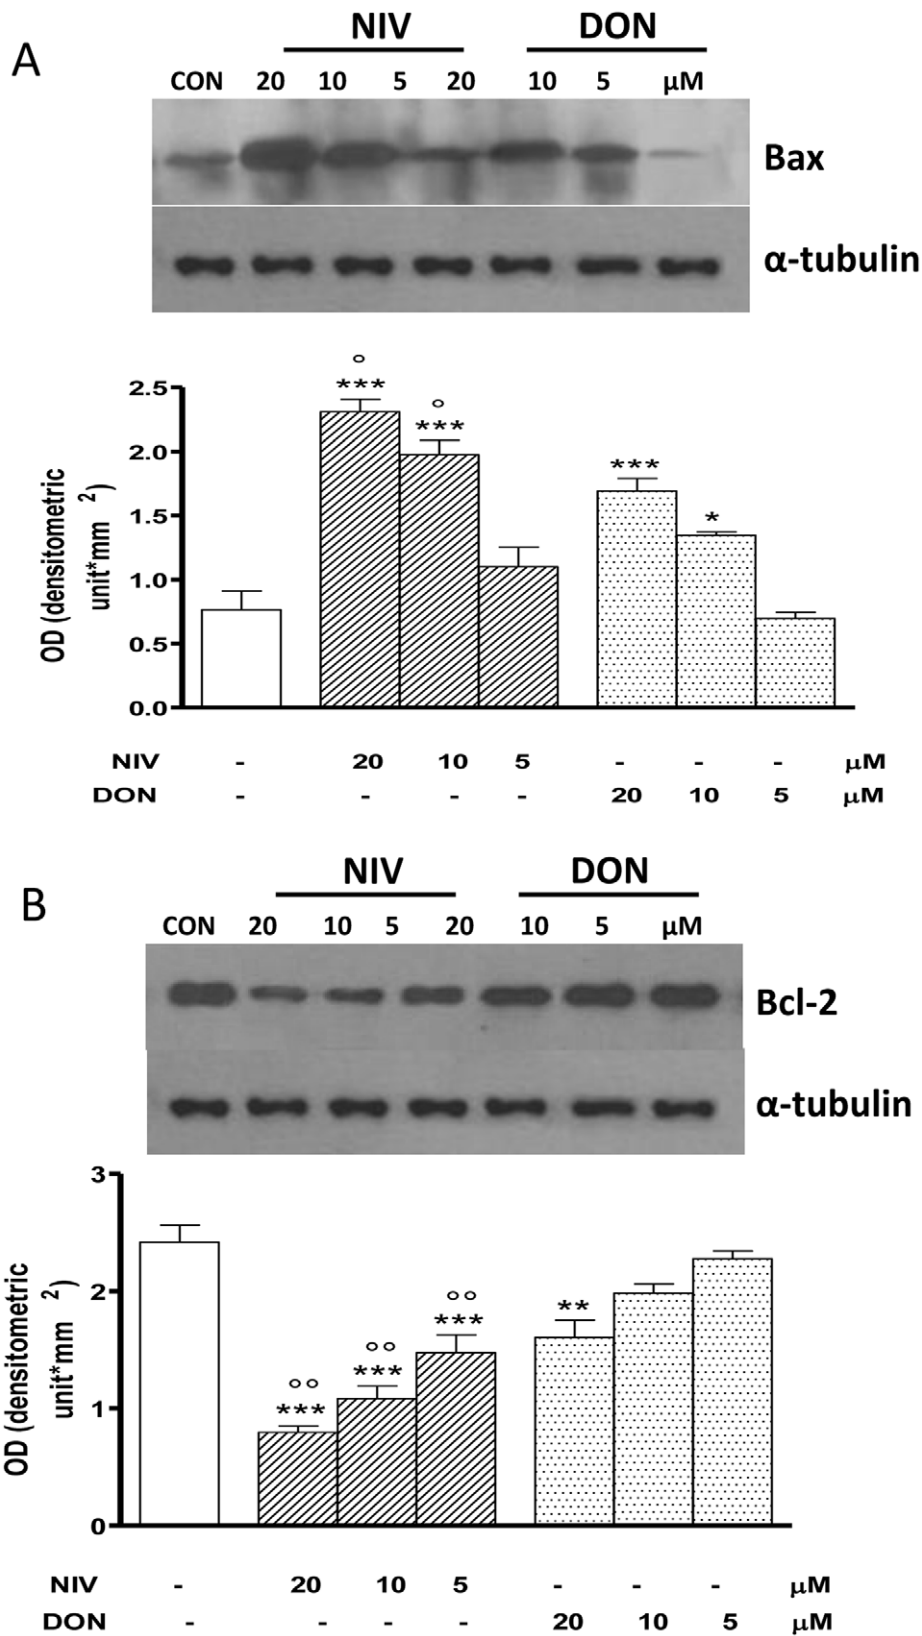

**Figure 4. Concentration dependent effect in NIV and DON treated cells on apoptosis-related proteins Bax (panel A) and Bcl-2 (panel B) expression.** Cells were treated with increasing concentration of NIV or DON (5–20  $\mu$ M) for 24 h and protein expression was detected by Western blot. Tubulin protein expression was used as a loading control. (\*\* $P < 0.001$ , \* $P < 0.01$ ,  $P < 0.05$  vs control;  $^{\circ}P < 0.01$ ,  $^{\circ}P < 0.05$  vs DON). Western blot is representative of at least three-independent experiments.  
doi:10.1371/journal.pone.0052051.g004

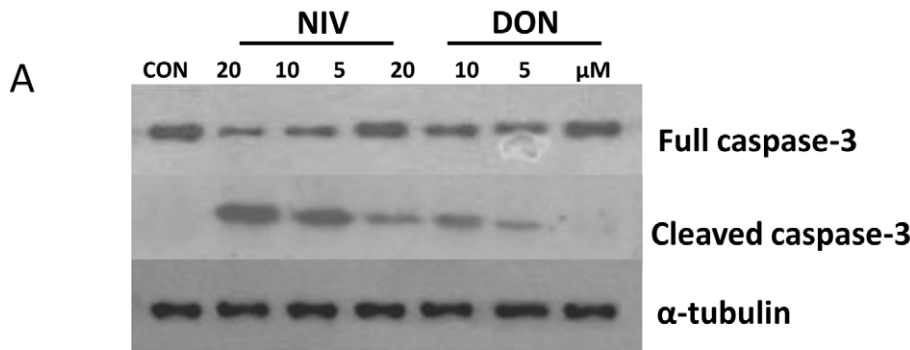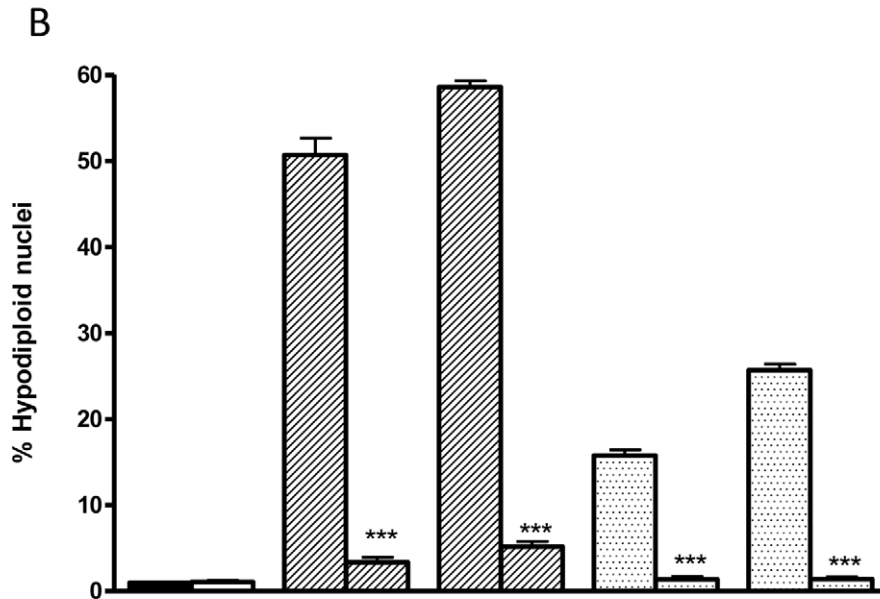

|                 |   |   |   |   |   |   |   |   |   |   |
|-----------------|---|---|---|---|---|---|---|---|---|---|
| NIV 20 $\mu$ M  | - | - | + | + | - | - | - | - | - | - |
| NIV 40 $\mu$ M  | - | - | - | - | + | + | - | - | - | - |
| DON 20 $\mu$ M  | - | - | - | - | - | - | + | + | - | - |
| DON 40 $\mu$ M  | - | - | - | - | - | - | - | - | + | + |
| ZVAD 50 $\mu$ M | - | + | - | + | - | + | - | + | - | + |

**Figure 5. Concentration dependent effect in NIV and DON treated cells on caspase-3 (full and cleaved form) expression.** Cells were treated with increasing concentration of NIV or DON (5–20  $\mu$ M) for 24 h and protein expression was detected by Western blot. Tubulin protein expression was used as a loading control. The Western blot is representative of independent experiments (panel A). Apoptosis detection by propidium iodide (PI) staining of hypodiploid nuclei with a broad spectrum caspase inhibitor (zVAD-fmk) (panel B). IEC-6 were treated with NIV or DON (20 and 40  $\mu$ M) for 24 h in presence of zVAD-fmk (50  $\mu$ M). The pro-apoptotic effect of NIV or DON was significantly reduced by the caspase inhibitor (\*\*\*) $P < 0.001$  NIV+zVAD vs NIV alone; (\*\*\*) $P < 0.001$  DON+zVAD vs DON alone). Data are expressed mean  $\pm$  s.e.m. from at least three independent experiments.

doi:10.1371/journal.pone.0052051.g005

the localization of the channels at the plasma membrane as well as to regulate the channel through gating [40,41]. Our evidence indicates that the exposure of IEC-6 to NIV or DON leads to a marked reduction in gap junction communication, reducing both Cx43 and its phosphorylated isoform (pCx43), leading to an impaired epithelial migration and thus to an impaired barrier repair. Our data are confirmed by another study which demonstrated the ability of DON to increase the paracellular permeability of Caco-2 cell monolayers and to reduce the expression of tight junction constituent protein claudin-4 and protein synthesis [42].

Various factors have been shown to stimulate epithelial restitution and proliferation and, among these, activation of focal adhesion kinase (FAK) has been linked to gastric wound healing.

FAK is a non-receptor tyrosine kinase involved in adhesion signalling in multiple cell types, including those of epithelial derivation. FAK has an established role in many cellular processes involved in intestinal homeostasis, including cell proliferation, migration and survival [43]. Through its kinase activity, FAK provides robust anti-apoptotic signals [44]. Expression of dominant-negative FAK mutants in intestinal epithelial cell lines leads to an increased apoptosis due to the loss of adhesion-mediated survival signals [45,46]; conversely, FAK over-expression has been shown to suppress apoptosis [47]. Our data show that DON and even more strongly NIV significantly reduced FAK expression in IEC-6. The IEC-6 cells were originally derived from the rat proximal small intestine. When confluent, these cells form monolayers that morphologically resemble normal small intestinal



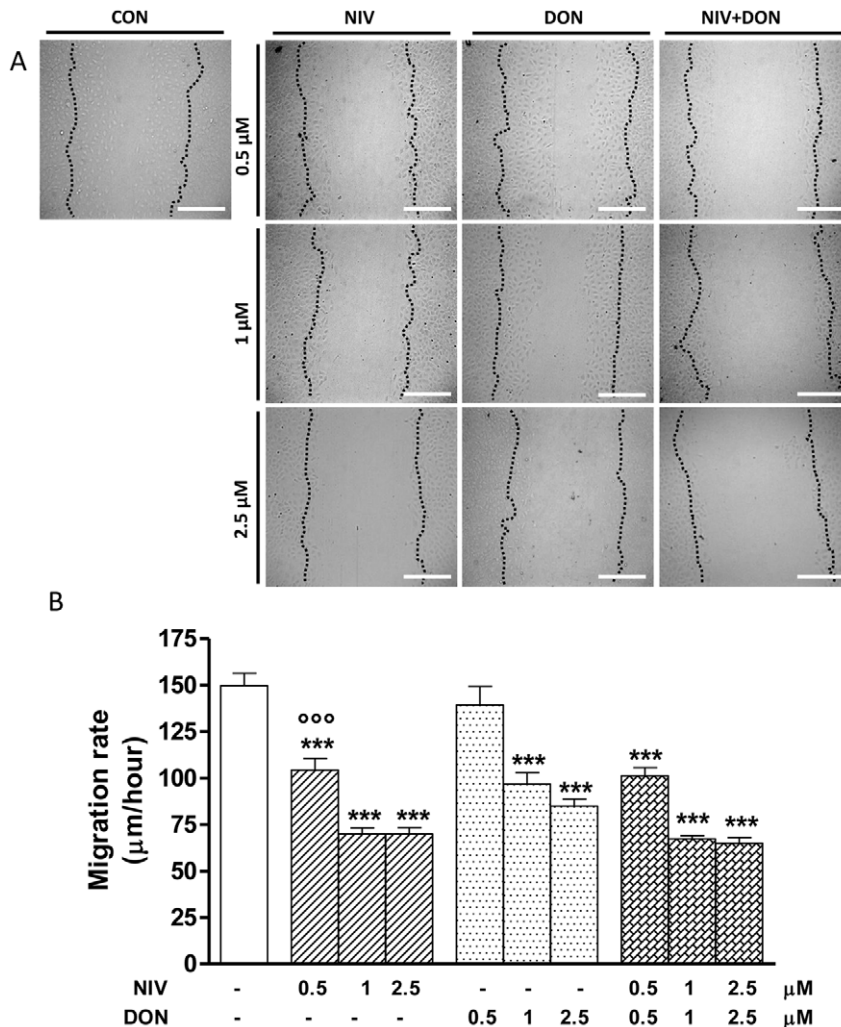

**Figure 6. Representative pictures of wound repair from mechanical scratch 24 h after NIV and DON cells treatment (0.5–2.5  $\mu\text{M}$ ).** Black dotted-line indicates the edge of the wounded area at the starting time (panel A). Quantitative analysis of the wound repair 24 h after making the scratch. For each condition ten different cells were randomly selected to measure the migration distances covered every 10 min from the initial time up to the end of incubation time (\*\* $P < 0.001$  vs control;  $oooP < 0.001$  vs DON; panel B). Data are expressed mean  $\pm$  s.e.m. from at least three-independent experiments. Bar = 200  $\mu\text{M}$ . doi:10.1371/journal.pone.0052051.g006

cells and exhibit a highly organized actin cytoskeleton [48,49]. During IECs restitution extensive reorganisation of the actin cytoskeleton is necessary. DON and more markedly NIV produced a marked decrease in actin stress fibers and a corresponding increase in the density of the cortical actin thus preventing IEC-6 migration.

The amount of NIV in cereal products varies considerably among world regions (from 20–60  $\mu\text{g}/\text{kg}$  in France, to 584–1780  $\mu\text{g}/\text{kg}$  in China) [15], depending on weather and culture conditions [50]. Estimated NIV intake of the French population is 88 ng/kg per day in adults, 163 ng/kg per day in children, and reaches 210 ng/kg per day in vegetarians [51]. In European countries, the daily intake remains below the provisional maximum tolerable daily intake (PMTDI) value of 0.7  $\mu\text{g}/\text{kg}$  per day, but in Asia, particularly in Japan and China, the daily intake may exceed the PMTDI. The concentration that we used in this study for NIV is 5  $\mu\text{M}$  (corresponding to about 1560  $\mu\text{g}/\text{Kg}$ ) and is consistent with the levels plausibly encountered in the gastrointestinal tract after consumption of heavily contaminated food. This may occur particularly in the case of unfavorable

weather conditions or in eastern regions of Asia [15,52,53], where particularly *Fusarium* species (e.g. *F. poae* and *F. crookwellense*) seems to be responsible for heavy contamination of cereals by NIV.

The range of the assayed DON concentrations is also in accordance with the levels plausibly encountered in the gastrointestinal tract after consumption of DON contaminated food. These values have been derived from estimated daily intakes of the SCOOP program [54]. The lower DON concentration (0.16  $\mu\text{g}/\text{ml}$  corresponding to 0.5  $\mu\text{M}$  used in this study) corresponds to the mean estimated daily intake of French adult consumers eating food contaminated by mean DON levels, on a chronic basis. The DON concentration of 2  $\mu\text{g}/\text{ml}$  corresponds to a high level that can be reached after consumption of heavily contaminated food that can be encountered occasionally (e.g. unfavourable weather conditions) or among children and vegans/macrobionics [55,51]. Bony et al. [20] previously reported also a genotoxic potential associated to low levels of NIV and the enhancement of intestinal inflammation by low doses of DON has also been reported [21]. Our data demonstrate that NIV and DON exert a pro-apoptotic effect on IEC-6 but, at low doses, also affect integrity and

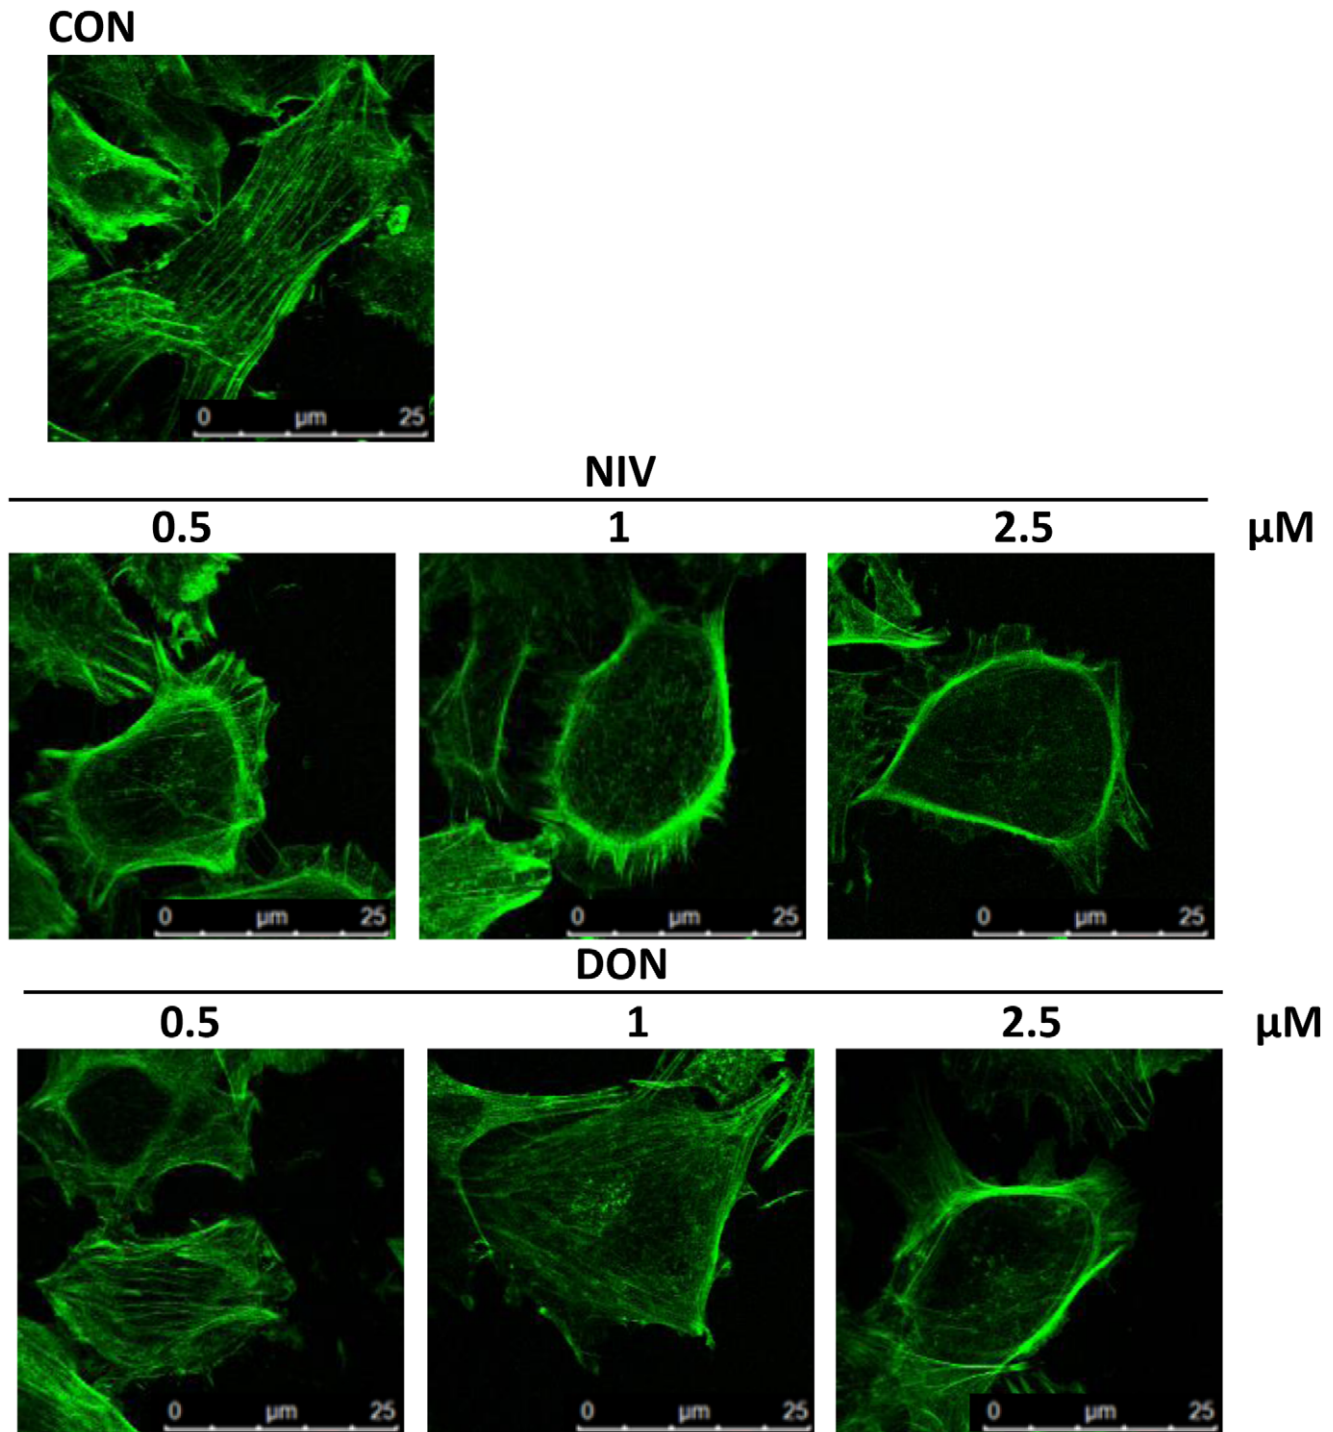

**Figure 7. Effect of mycotoxins NIV and DON on IEC-6 cytoskeleton highlighted by FITC-coniugated phalloidin staining.** The microtubule cytoskeleton is displayed in control IEC-6. The microtubules are evident as actin filaments that originate near the nucleus and radiate through the cytosol. Incubation for 24 h of cultured cells with NIV and DON (0.5–2.5  $\mu\text{M}$ ) caused a reorganisation of actin filaments characterised by redistribution to the cell subcortical compartment and subsequent cell rounding in concentration dependent manner. Cultures were examined and photographed using a confocal microscope as described in method section.  
doi:10.1371/journal.pone.0052051.g007

functioning of intestinal epithelial cells providing evidence for an additional toxic mechanism. While the contemporary presence of NIV and DON has not been associated with a greater toxicity, our results highlighted the stronger toxic effect of NIV respect to DON on IEC. Thus, although less present in contaminating food and

feed, our results point out the importance of the toxic effect of NIV further highlighting the risk assessment process of these toxins that are of growing concern.

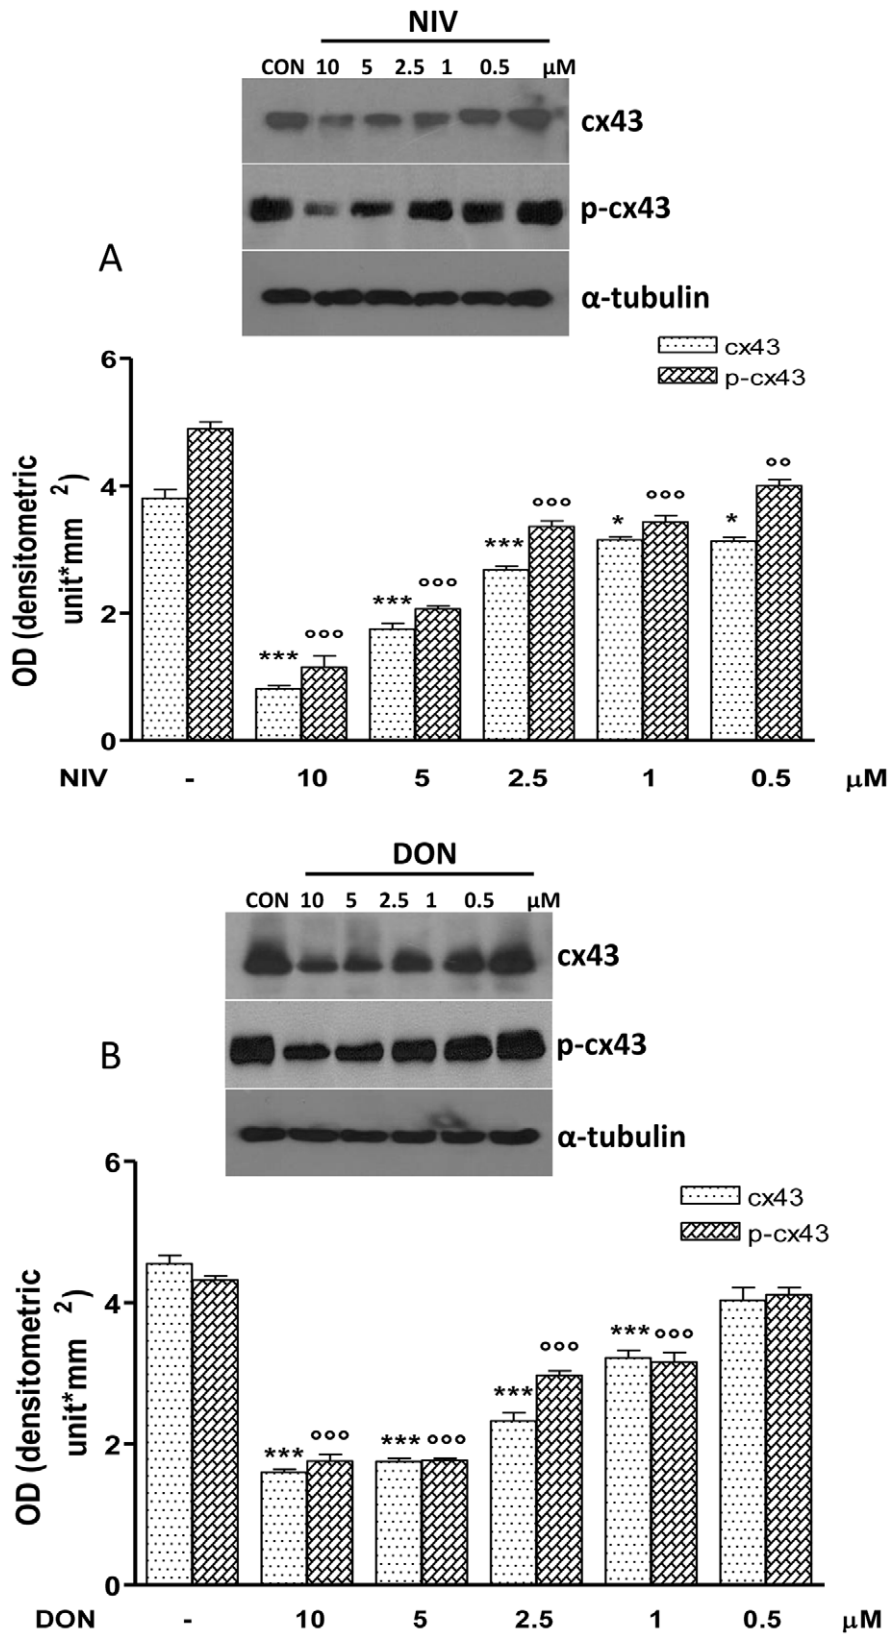

**Figure 8. Concentration dependent effect in NIV (Panel A) and DON (Panel B) treated cells on Cx43 and its phosphorylated form (pCx43) expression.** Cells were treated with increasing concentration of NIV or DON (0.5–10 μM) for 24 h and protein expression was detected by Western blot (\*\*P<0.001, \*P<0.05 vs control; °°P<0.001, °°P<0.05 vs DON). Tubulin protein expression was used as a loading control. The Western blot is representative of at least three independent experiments.  
doi:10.1371/journal.pone.0052051.g008

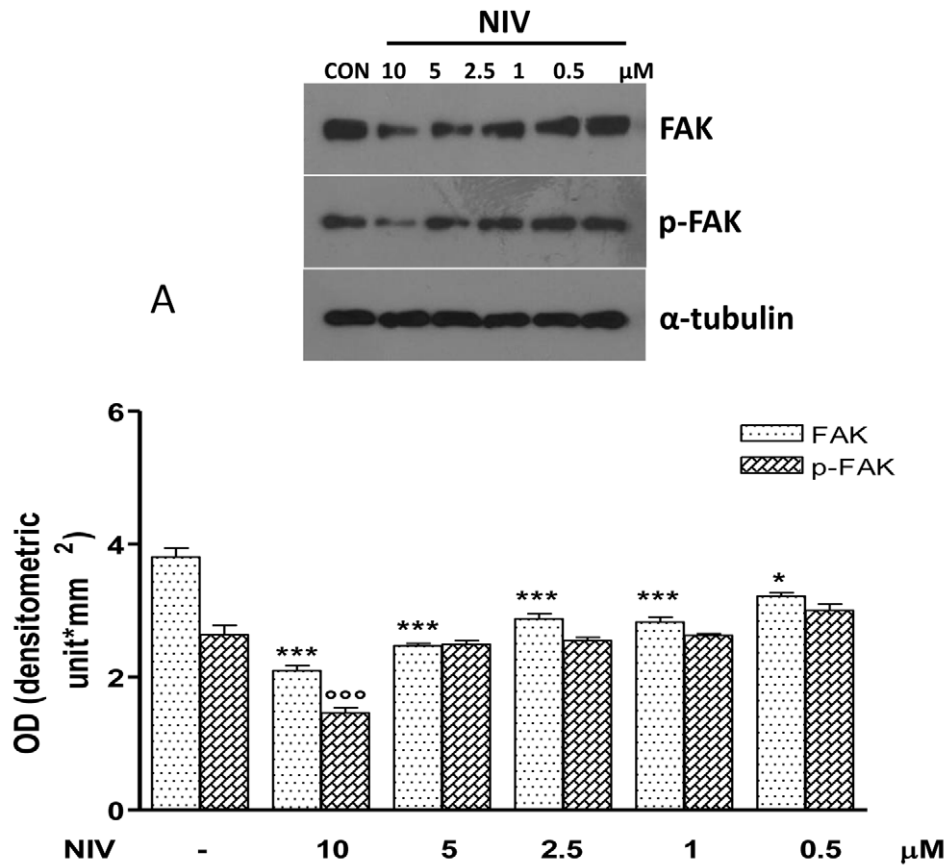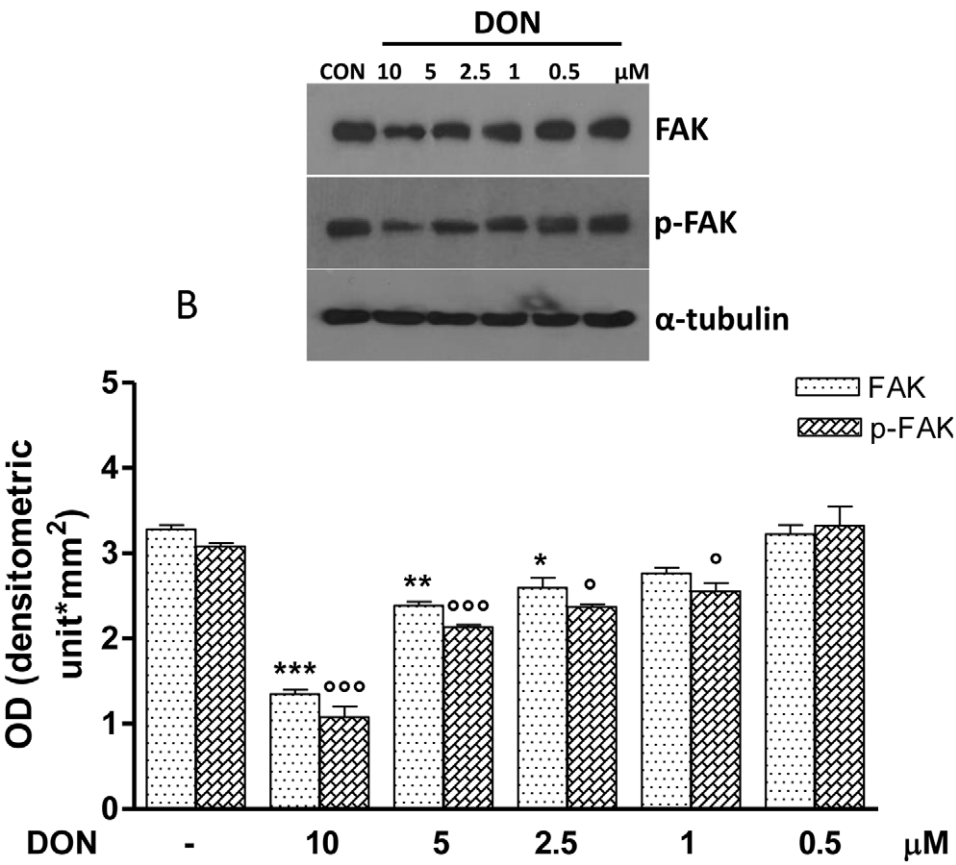

**Figure 9. Concentration dependent effect in NIV (Panel A) and DON (Panel B) treated cells on FAK and its phosphorylated form expression (pFAK).** Cells were treated with increasing concentration of NIV or DON (0.5–10  $\mu\text{M}$ ) for 24 h and protein expression was detected by Western blot. (\*\* $P < 0.001$ , \* $P < 0.01$ ,  $P < 0.05$  vs control;  $^{\circ\circ}P < 0.001$ ,  $^{\circ}P < 0.05$  vs DON). Tubulin protein expression was used as a loading control. The Western blot is representative of at least three-independent experiments. doi:10.1371/journal.pone.0052051.g009

## Author Contributions

Conceived and designed the experiments: GB GA SM. Performed the experiments: GB BF SM. Analyzed the data: GB SM. Contributed

reagents/materials/analysis tools: GB BF LS AQ SM. Wrote the paper: GB SM.

## References

- Albassam M, Yong S, Bhatnagar R, Sharma A, Prior M (1987) Histopathologic and electron microscopic studies on the acute toxicity of ochratoxin A in rats. *Vet Pathol* 24, 427–435.
- Azcona-Olivera J, Ouang J, Murtha J, Chu F, Pestka J (1995) Induction of cytokine mRNAs in mice after oral exposure to the trichothecene vomitoxin (deoxynivalenol): relationship to toxin distribution and protein synthesis inhibition. *Toxicol Appl Pharmacol* 133, 109–120.
- Heussener AH, Dietrich DR, O'Brien E (2006) In vitro investigation of individual and combined cytotoxic effects of ochratoxin A and other selected mycotoxins on renal cells. *Toxicol In Vitro* 20, 332–41.
- Ueno Y (1985) The toxicology of mycotoxins. *Crit Rev Toxicol* 14, 99–132.
- Schorthorst RC, Van Egmond HP (2004) Report from SCOOP task 3.2.10 "collection of occurrence data of Fusarium toxins in food and assessment of dietary intake by the population of EU member states". Subtask: trichothecenes. *Toxicol Lett* 153, 133–43.
- Bretz M, Beyer M, Cramer B, Knecht A, Humpf HU (2006) Thermal degradation of the Fusarium mycotoxin deoxynivalenol. *J Agric Food Chem* 54, 6445–51.
- Hazel CM, Patel S (2004) Influence of processing on trichothecene levels. *Toxicol Lett* 153, 51–59.
- Prelusky DB, Miller JD, Trenholm HL (1996) Disposition of  $^{14}\text{C}$ -derived residues in tissues of pigs fed radiolabelled fumonisin B1. *Food Addit Contam* 13, 155–162.
- Shephard GS, Thiel PG, Sydenham EW, Snijman PW (1995) Toxicokinetics of the mycotoxin fumonisin B2 in rats. *Food Chem Toxicol* 33, 591–5.
- Rotter BA, Prelusky DB, Thompson BK (1996) The role of tryptophan in DON-induced feed rejection. *J Environ Sci Health B* 31, 1279–1288.
- Pestka JJ, Smolinski AT (2005) Deoxynivalenol: toxicology and potential effects on humans. *J Toxicol Environ Health B Crit Rev* 8, 39–69.
- Bouhet S, Oswald IP (2005) The effects of mycotoxins, fungal food contaminants, on the intestinal epithelial cell-derived innate immune response. *Vet Immunol Immunopathol* 108, 199–209.
- Ryu JC, Ohtsubo K, Izumiyama N, Nakamura K, Tanaka T, et al. (1988) The acute and chronic toxicities of nivalenol in mice. *Fundam Appl Toxicol* 11, 38–47.
- Hsia CC, Wu JL, Lu XQ, Li YS (1988) Natural occurrence and clastogenic effects of nivalenol, deoxynivalenol, 3-acetyl-deoxynivalenol, 15-acetyl-deoxynivalenol, and zearalenone in corn from a high-risk area of esophageal cancer. *Cancer Detect Prev* 13, 79–86.
- Hsia CC, Wu ZY, Li YS, Zhang F, Sun ZT (2004) Nivalenol, a main Fusarium toxin in dietary foods from high-risk areas of cancer of esophagus and gastric cardia in China, induced benign and malignant tumors in mice. *Oncol Rep* 12, 449–56.
- Kasuga F, Hara-Kudo Y, Saito N, Kumagai S, Sugita-Konishi Y (1998) In vitro effect of deoxynivalenol on the differentiation of human colonic cell lines Caco-2 and T84. *Mycopathologia* 142, 161–167.
- Sergent T, Parys M, Garsou S, Pussemier L, Schneider YJ, et al. (2006). Deoxynivalenol transport across human intestinal Caco-2 cells and its effects on cellular metabolism at realistic intestinal concentrations. *Toxicol Lett* 164, 167–76.
- Pinton P, Nougayrède JP, Del Rio JC, Moreno C, Marin DE, et al. (2009) The food contaminant deoxynivalenol, decreases intestinal barrier permeability and reduces claudin expression. *Toxicol Appl Pharmacol* 237, 41–48.
- Maresca M, Mahfoud R, Garmy N, Fantini J (2002) The mycotoxin deoxynivalenol affects nutrient absorption in human intestinal epithelial cells. *J Nutr* 132, 2723–31.
- Bony S, Olivier-Loiseau L, Carcelen M, Devaux A (2007) Genotoxic potential associated with low levels of the Fusarium mycotoxins nivalenol and fusarenon X in a human intestinal cell line. *Toxicol In Vitro* 21, 457–65.
- Vandenbroucke V, Croubels S, Martel A, Verbrugge E, Goossens J (2011) The mycotoxin deoxynivalenol potentiates intestinal inflammation by Salmonella typhimurium in porcine ileal loops. *PLoS One* 6(8):e23871.
- Kenichi S, Masahiro I, Kenji S, Shiho K, Hiroaki I, et al. (2006) Sucralfate prevents the delay of wound repair in intestinal epithelial cells by hydrogen peroxide through NF- $\kappa\text{B}$  pathway. *J Gastroenterol* 41, 450–461.
- Mosmann T (1983) Rapid colorimetric assay for cellular growth and survival: application to proliferation and cytotoxicity assays. *J Immunol Methods* 65, 55–63.
- Cioffi G, Dal Piaz F, De Caprariis P, Sanogo R, Marzocco S, et al. (2006) Antiproliferative triterpene saponins from *Entada africana*. *J Nat Prod* Sep;69(9):1323–9.
- Marzocco S, Popolo A, Bianco G, Pinto A, Autore G (2010) Pro-apoptotic effect of methylguanidine on hydrogen peroxide-treated rat glioma cell line. *Neurochem Int* Nov;57(5):518–24.
- Bianco G, Russo R, Marzocco S, Velotto S, Autore G, et al. (2012) Modulation of macrophage activity by aflatoxins B1 and B2 and their metabolites aflatoxins M1 and M2. *Toxicol May;59(6):644–50*.
- Saraste A, Pulkki K (2000) Morphologic and biochemical hallmarks of apoptosis. *Cardiovasc Res* 45, 528–37.
- Sundstol Eriksen G, Pettersson H (2003) Lack of de-epoxidation of type B trichothecenes in incubates with human faeces. *Food Addit Contam* 20, 579–82.
- Meky FA, Turner PC, Ashcroft AE, Miller JD, Qiao YL, et al. (2003) Development of a urinary biomarker of human exposure to deoxynivalenol. *Molecular Epidemiology Unit* 41, 265–73.
- Videmann B, Tep J, Cavret S, Lecoecur S (2007) Epithelial transport of deoxynivalenol: involvement of human P-glycoprotein (ABCB1) and multidrug resistance-associated protein 2 (ABCC2). *Métabolisme et Toxicologie Comparée des Xénobiotiques* 45, 1938–1947.
- Speijers GJA, Speijers MHM (2004) Combined toxic effects of mycotoxins. *Toxicol. Lett.*, 153 (1), 91–98.
- Eskola M, Parikka P, Rizzo A (1998) Trichothecenes, ochratoxin A and zearalenone contamination and Fusarium infection in Finnish cereal samples in 1998. *Food Addit. Contam.*, 18, 707–71.
- Luongo D, De Luna R, Russo R, Severino L (2008) Effects of four Fusarium toxins (fumonisin B1, alpha-zearalenol, nivalenol, deoxynivalenol) on porcine whole-blood cellular proliferation. *Toxicol*, 52, 156–162.
- Marzocco S, Russo R, Bianco G, Autore G, Severino L (2009) Pro-apoptotic effects of nivalenol and deoxynivalenol trichothecenes in J774A.1 murine macrophages. *Toxicol Lett* 189, 21–6.
- Diesing AK, Nossol C, Dänicke S, Walk N, Post A, et al. (2011) Vulnerability of polarised intestinal porcine epithelial cells to mycotoxin deoxynivalenol depends on the route of application. *PLoS One* 6, 17472.
- Izuka M, Konno S (2011). Wound healing of intestinal epithelial cells. *World J Gastroenterol* 17, 2161–2171.
- Leaphart CL, Qureshi F, Cetin S, Li J, Dubowski T, et al. (2007) Interferon-gamma inhibits intestinal restitution by preventing gap junction communication between enterocytes. *Gastroenterology* 132, 2395–2411.
- Goodenough DA (1974) Bulk isolation mouse epithelial cell gap junctions. Characterization of the principal protein, connexin. *J Cell Biol* 61, 557–563.
- Goodenough DA (1975) The structure of cell membranes involved in intercellular communication. *Am J Clin Pathol* 63, 636–645.
- Laird DW (2005) Connexin phosphorylation as regulatory event linked to gap junctions internalization and degradation. *Biochim Biophys Acta* 1711, 172–182.
- Lampe PD, Tenbroek EM, Burt JM, Kurata WE, Johnson RG, et al. (2000) Phosphorylation of connexin43 on serine368 by protein kinase C regulates gap junctions communication. *J Cell Biol* 149, 1503–1512.
- De Walle JV, Sergent T, Piront N, Toussaint O, Schneider YJ, et al. (2010) Deoxynivalenol affects in vitro intestinal epithelial cell barrier integrity through inhibition of protein synthesis. *Toxicol Appl Pharmacol* 245, 291–8.
- Hao HF, Naomoto Y, Bao XH, Watanabe N, Sakurama K, et al. (2009) Progress in researches about focal adhesion kinase in gastrointestinal tract. *World J Gastroenterol* 15, 5916–5923.
- Mitra SK, Schlaepfer DD (2006) Integrin-regulated FAK-Src. Signaling in normal and cancer cells. *Curr Opin Cell Biol* 18, 516–523.
- Bouchard V, Demers MJ, Thibodeau S, Laquerre V, Fujita N, et al. (2007) Fak/Src. Signaling in human intestinal epithelial cell survival and anoikis: differentiation state-specific uncoupling with the PI3-K/Akt-1 and MEK/Erk pathways. *J Cell Physiol* 212, 717–728.
- Bouchard V, Harnois C, Demers MJ, Thibodeau S, Laquerre V, et al. (2008) Beta1 integrin/Fak/Src signaling in intestinal epithelial crypt cell survival: integration of complex regulatory mechanisms. *Apoptosis* 13, 531–542.
- Zhang HM, Keledjian KM, Rao JN, Zou T, Liu L, et al. (2006) Induced focal adhesion kinase expression suppresses apoptosis by activating NF-kappaB signaling in intestinal epithelial cells. *Am J Physiol Cell Physiol* 290, 1310–1320.
- McGuire PG, Seeds NW (1989) The interaction of plasminogen activator with a reconstituted basement membrane matrix and extracellular macromolecules produced by cultured epithelial cells. *J Cell Biochem* 40, 215–27.

49. Quaroni A, Wands J, Trelstad RL, Iselbacher KJ (1979) Epithelioid cell cultures from rat small intestine. Characterization by morphologic and immunologic criteria. *J Cell Biol* 80, 248–265.
50. Edwards SG (2004) Influence of agricultural practices on fusarium infection of cereals and subsequent contamination of grain by trichothecene mycotoxins. *Toxicol Lett* 153, 29–35.
51. Leblanc JC, Tard A, Volatier JL, Verger P (2005) Estimated dietary exposure to principal food mycotoxins from the first French Total Diet Study. *Food Addit Contam* 22, 652–72.
52. Tanaka T, Hasegawa A, Matsuki Y, Ueno Y (1985) A survey of the occurrence of nivalenol, deoxynivalenol and zearalenone in food stuffs and health foods in Japan. *Food Addit Contam* 2, 259–65.
53. Sugiura Y, Fukasaku K, Tanaka T, Matsui Y, Ueno Y (1993) *Fusarium poae* and *Fusarium crookwellense*, Fungi Responsible for the Natural Occurrence of Nivalenol in Hokkaido. *Appl Environ Microbiol* 59, 3334–8.
54. EC (2003) Collection of Occurrence Data of Fusarium Toxins in Food and Assessment of Dietary Intake by the population of EU Member States. European Commission: Health and Consumers Protection Directorate-General 1–606.
55. Larsen JC, Hunt J, Perrin I, Ruckebauer P (2004) Workshop on trichothecenes with a focus on DON: summary report. Institute of Food Safety and Nutrition 153, 1–22.
